# Supplementary material for: Coordination polymers of flexible polycarboxylic acids with metal ions. V. polymeric frameworks of 5-(3,5-dicarboxybenzyloxy)-3-pyridine carboxylic acid with Cd(ii), Cu(ii), Co(ii), Mn(ii) and Ni(ii) ions; synthesis, structure, and magnetic properties
Source: Royal Society of Chemistry journal article supplement (doi:10.1039/c3ce27023h), 2013-01-01
Supplement: c3ce27023h.pdf [file c3ce27023h.pdf]

## Supporting Information

**Coordination polymers of flexible poly-carboxylic acids with metal ions.  
V. Polymeric frameworks of 5-(3,5-dicarboxybenzyloxy)-3-pyridine  
carboxylic acid with Cd(II), Cu(II), Co(II), Mn(II) and Ni(II) ions;  
synthesis, structure, and magnetic properties.**

**Ranjan Patra, Hatem M. Titi and Israel Goldberg\***

*School of Chemistry, Sackler Faculty of Exact Sciences, Tel-Aviv University, Ramat-Aviv,  
69978 Tel-Aviv, Israel. E-mail: ranjanpatra06@gmail.com; goldberg@post.tau.ac.il*

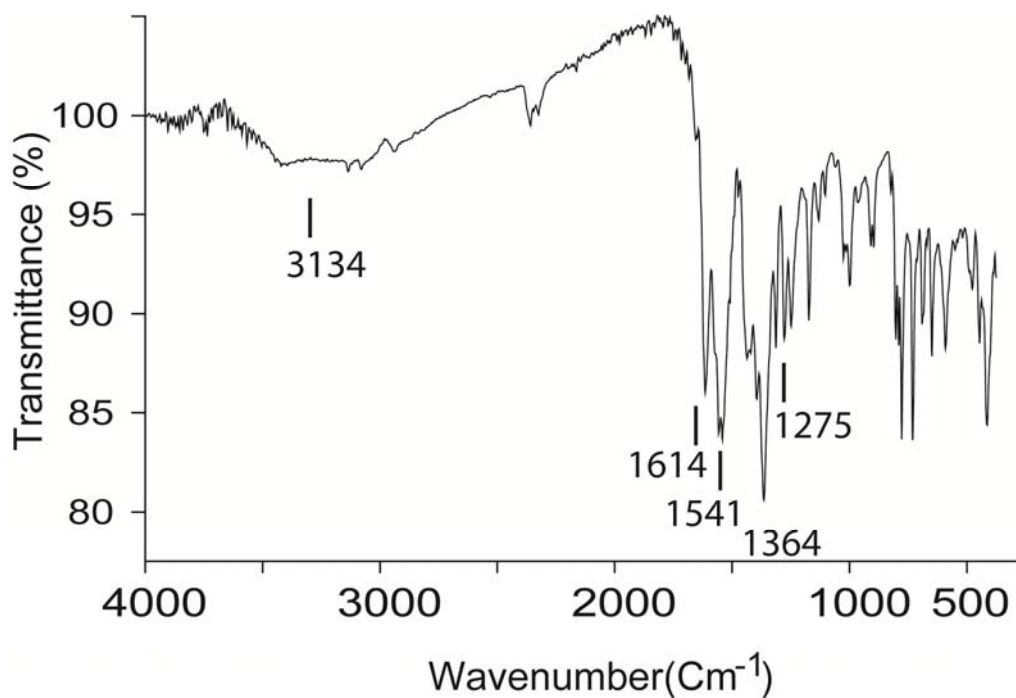

**Figure S1:** IR Spectra of Compound 1

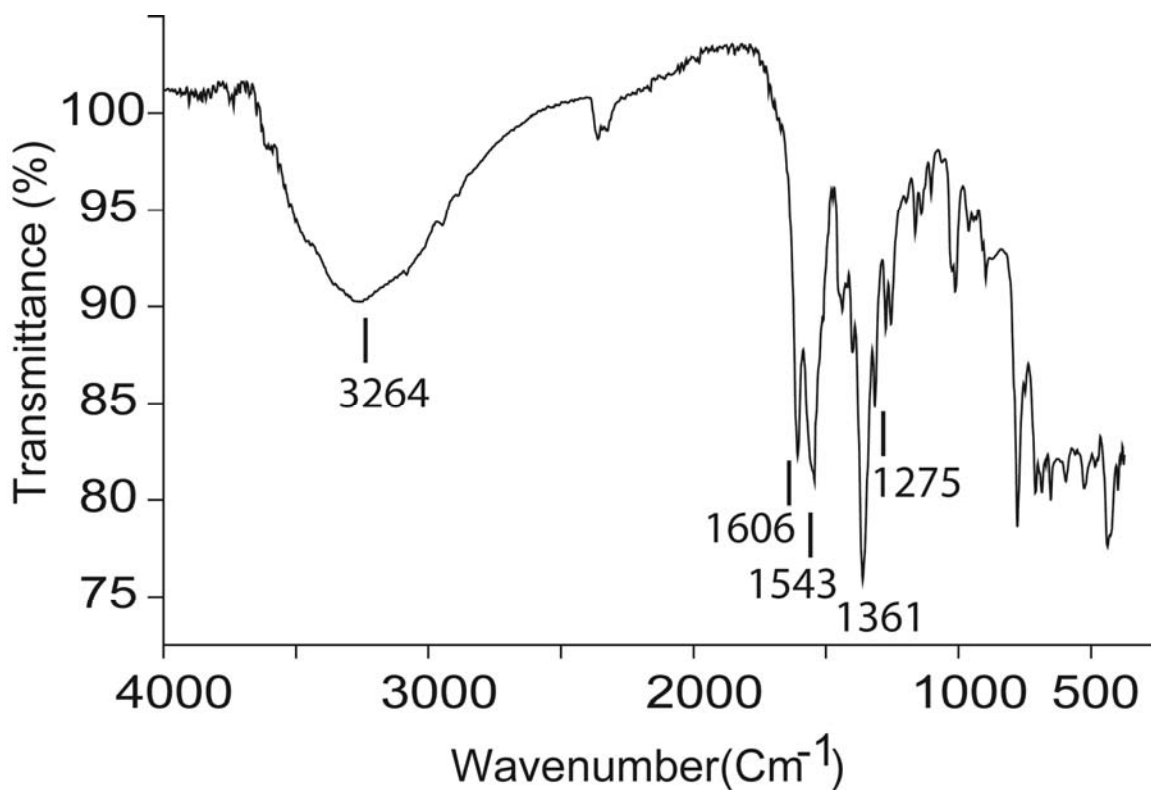

**Figure S3:** IR Spectra of Compound 2

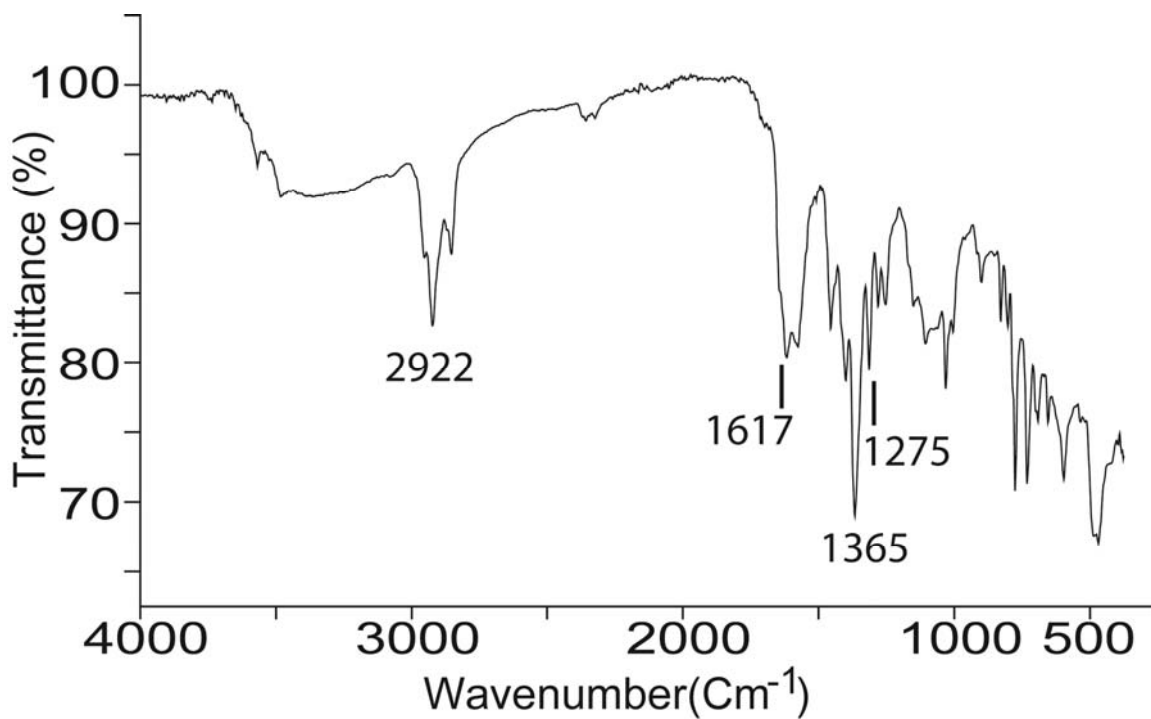

**Figure S4:** IR Spectra of Compound 3

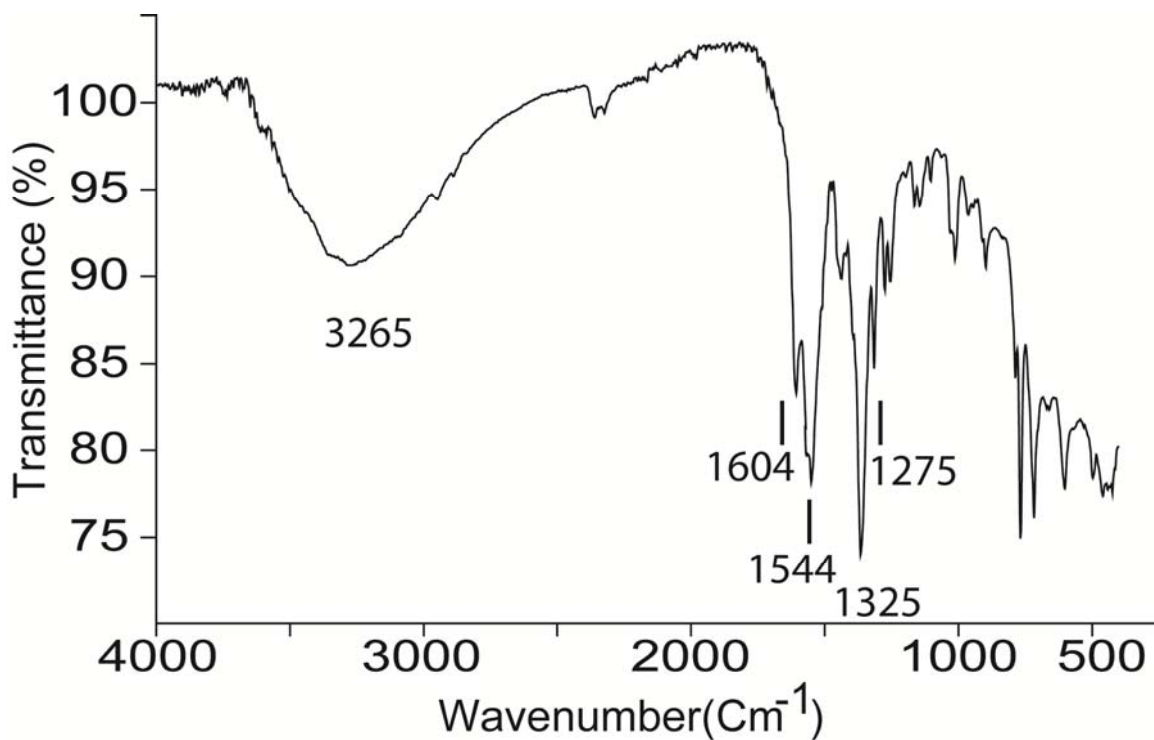

**Figure S4:** IR Spectra of Compound 4

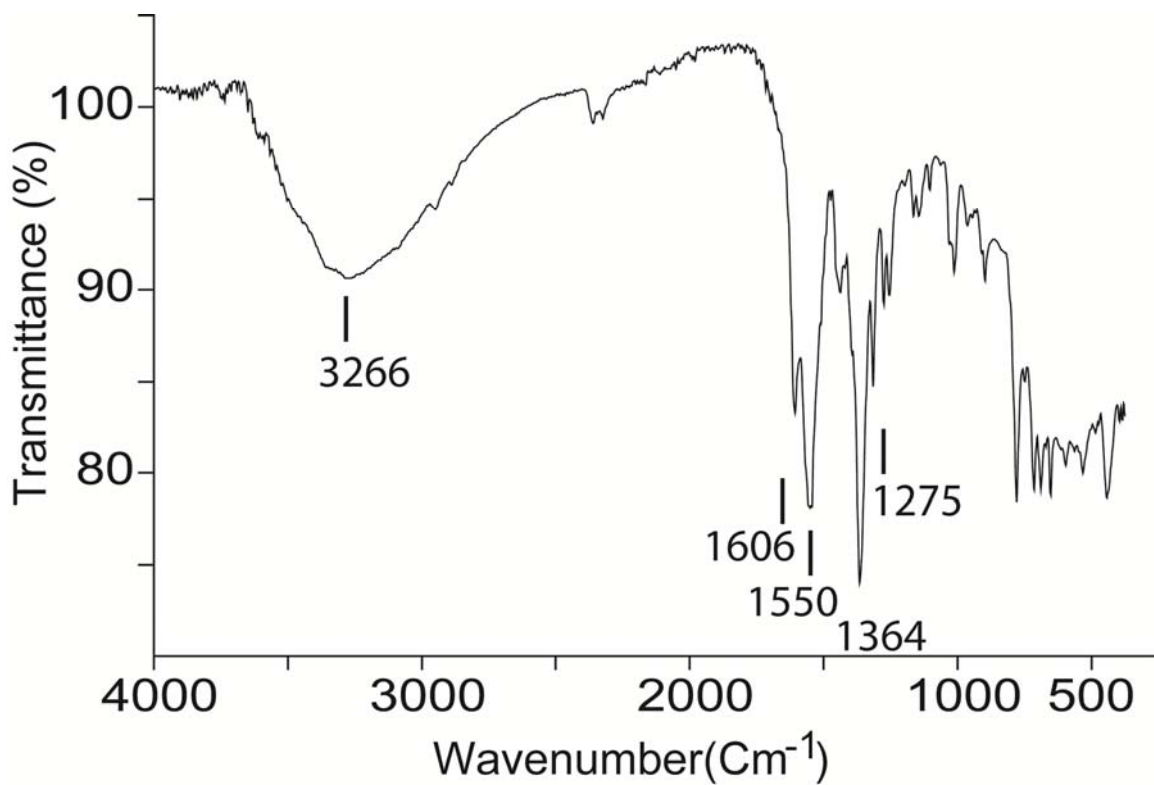

**Figure S5:** IR Spectra of Compound 5

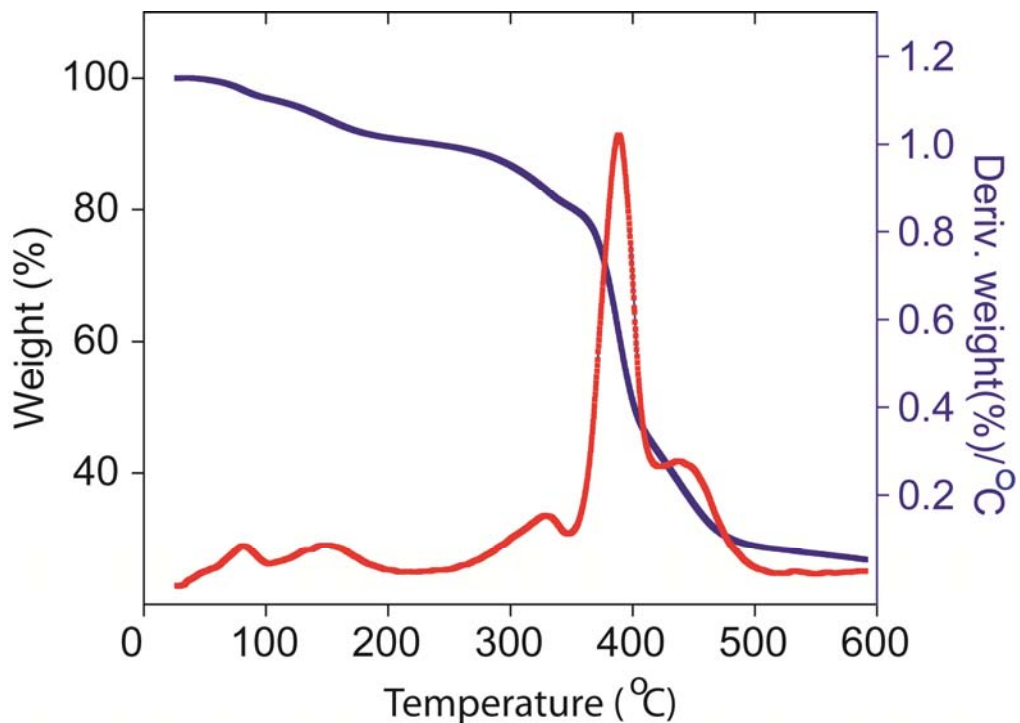

**Figure S6:** TGA-DTA analysis of compound **1**

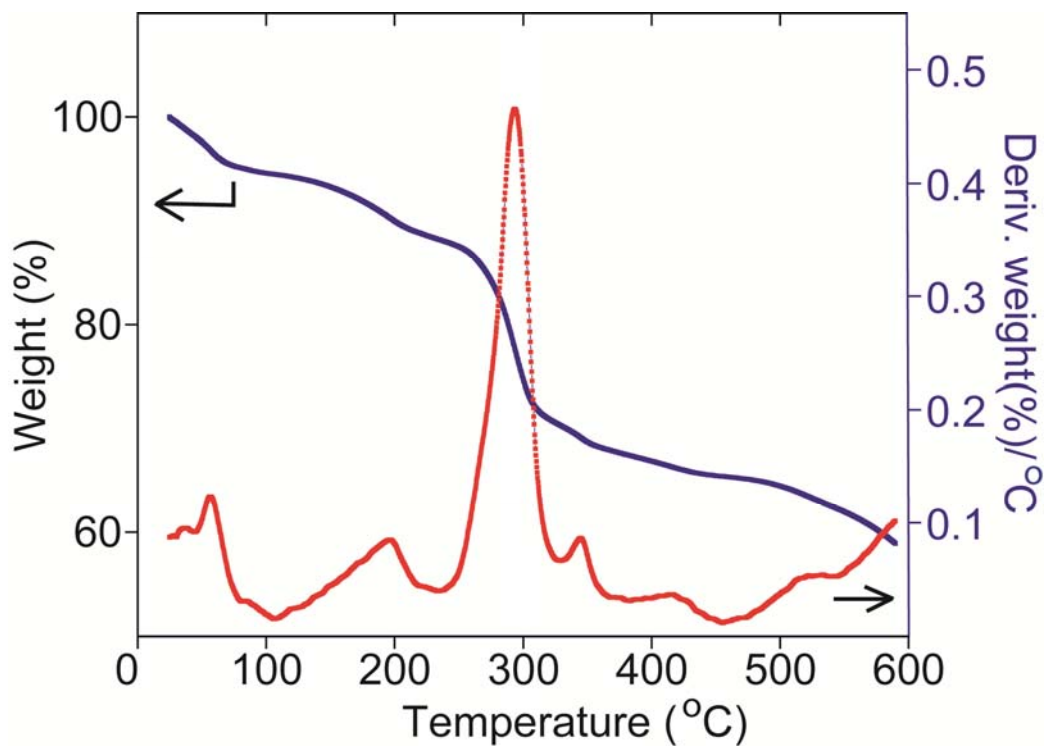

**Figure S7:** TGA-DTA analysis of compound **2**

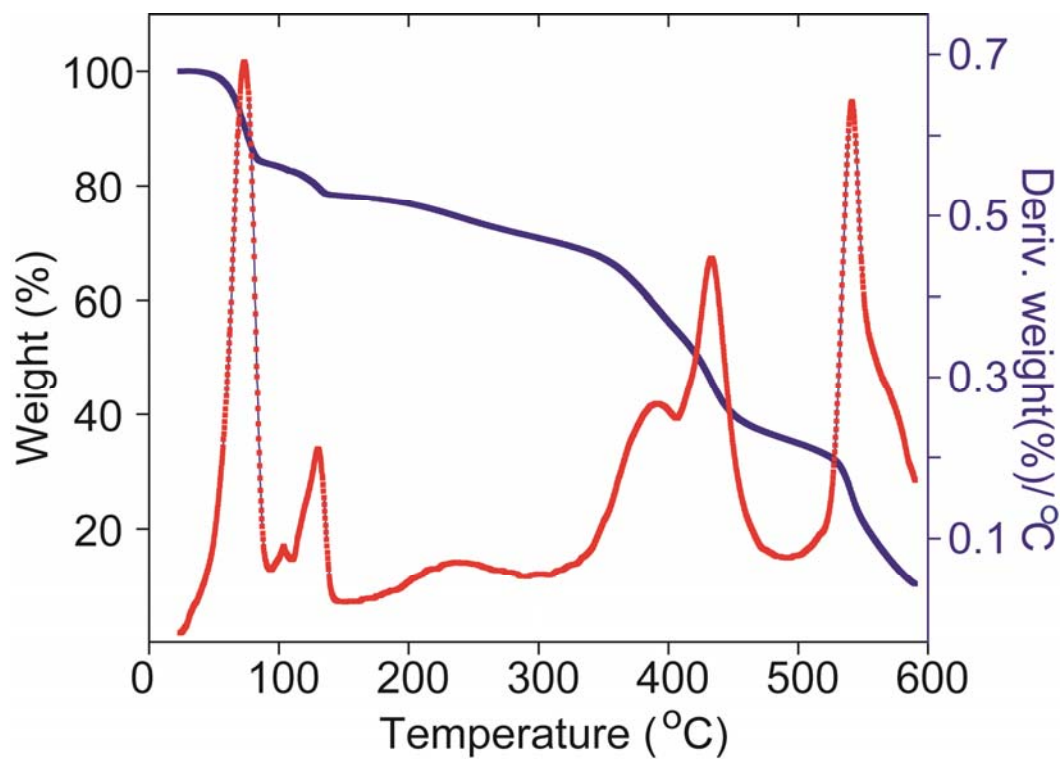

**Figure S8:** TGA-DTA analysis of compound **3**

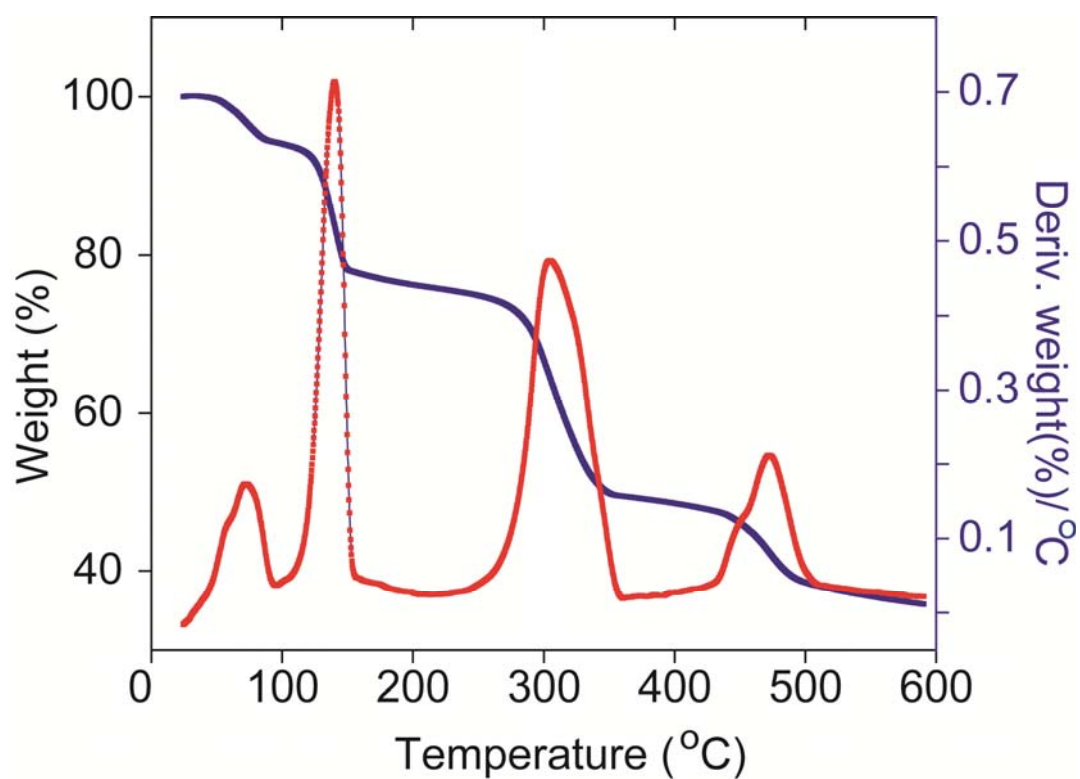

**Figure S9:** TGA-DTA analysis of compound **4**

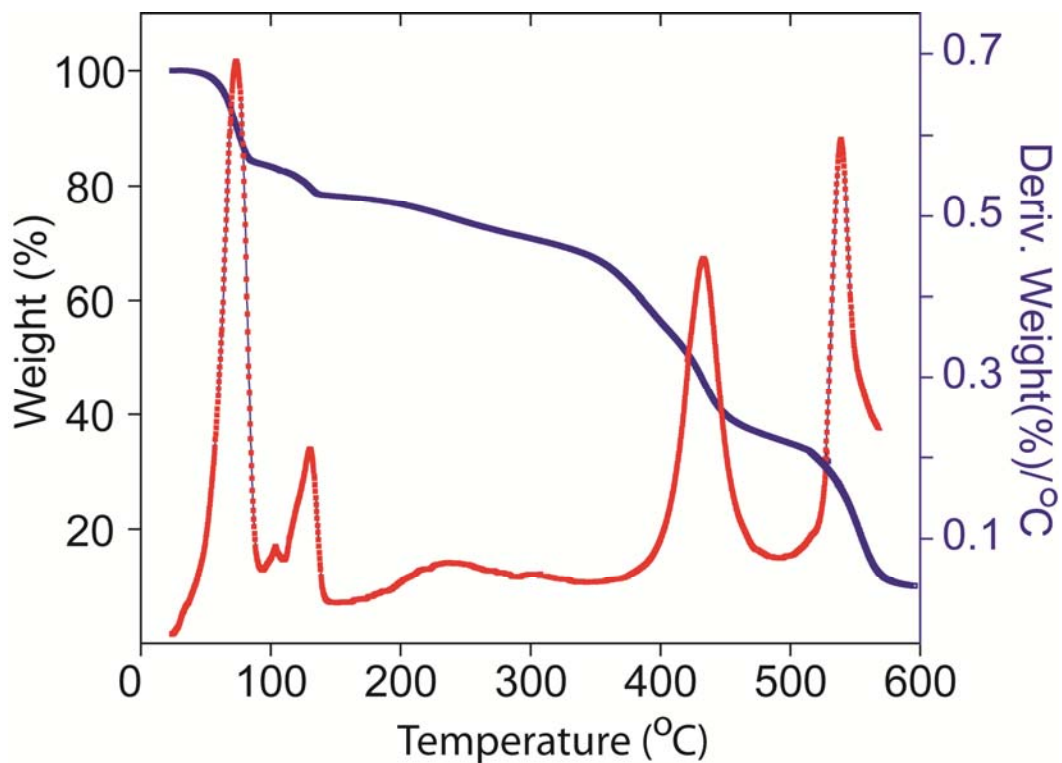

**Figure S10:** TGA-DTA analysis of compound **4**

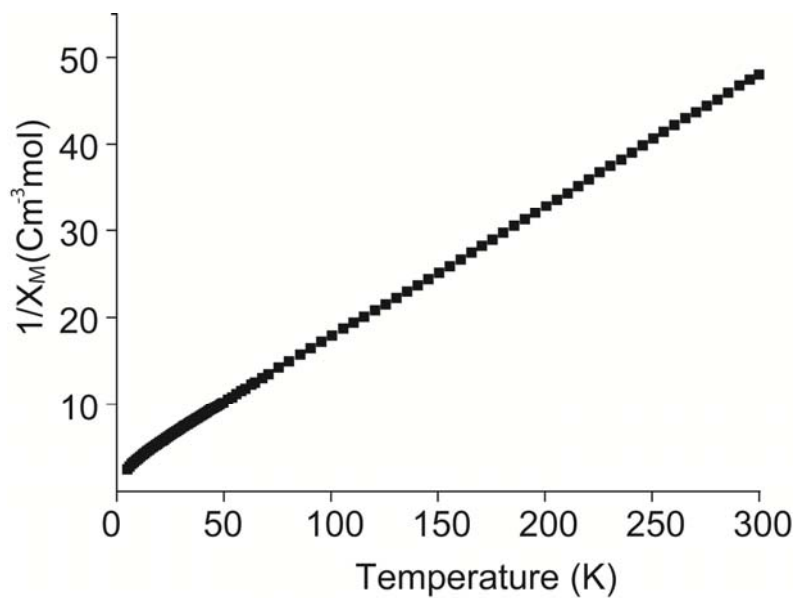

**Figure S11:**  $1/X_M$  Vs T for compound **3**
